# Supplementary material for: Fluorescent recognition of Hg2+ by a 1,1′-binaphthyl-based macrocycle: a highly selective off–on–off response
Source: Royal Society of Chemistry journal article supplement (doi:10.1039/c5cc02457a), 2015-01-01
Supplement: c5cc02457a2.pdf [file c5cc02457a2.pdf]

*Supporting information for*

## **Fluorescent Recognition of Hg<sup>2+</sup> by a 1,1'-Binaphthyl-Based Macrocycle: A Highly Selective Off-On-Off Response**

Xiangchuan Xu, Carl O. Trindle, Guoqing Zhang\* and Lin Pu\*

### **Part I. Materials and methods.**

**Materials.** (S)-(-)-1,1'-Bi-2-naphthol was purchased from LianYunGang Chiral Chemical (China) Co., LTD and purified by recrystallization. Chloromethyl methyl ether was obtained from Xiya Reagent and used as received. n-Butyllithium solution (2.5 M in hexane) was obtained from Aladdin Reagent (Shanghai) while the (1R, 2R)-(-)-1,2-Cyclohexanediamine was brought from TCI and they were used as received. All other solvents were obtained from Aladdin Reagent and were used as received.

**Methods.** <sup>1</sup>H NMR (400 MHz) spectra were recorded on a Bruker AV 400 NMR spectrometer operated in the Fourier transform mode. UV-Vis absorption spectra were recorded on a Beijing Persee TU-1901 UV-Vis spectrometer. Melting points of crystals were recorded on a SGW-X4 (Shanghai Precision and Scientific Instrument Co., Ltd.) illuminated microscope melting point apparatus. HRMS spectra were recorded on a BrukerDaltonics Bio TOF mass spectrometer. Steady-state fluorescence emission spectra was recorded on a FluoroMax-4 spectrofluorometer (Horiba Scientific) and analyzed with an Origin integrated software FluoroEssence (v2.2). Fluorescence lifetime data were acquired with a 1MHz LED laser with the excitation peak at 370 nm (NanoLED-370). Lifetime data were analyzed with DataStation v6.6 (Horiba Scientific).

---

## Part II. Synthesis.

(*S*)-**3**. Compound (*S*)-**1** (458 mg, 1.34 mmol) and (1*R*, 2*R*)-(-)-1,2-cyclohexanediamine (154 mg, 1.34 mmol) were dissolved in dry CH<sub>2</sub>Cl<sub>2</sub> under N<sub>2</sub>, and the mixture was stirred at room temperature for 2 d. After evaporation of the solvent, the crude product was purified by recrystallization with CH<sub>2</sub>Cl<sub>2</sub>/methanol to afford compound (*S*)-**2** as a yellow solid. This compound (336.4 mg, 0.4 mmol) was combined with NaBH<sub>4</sub> (30.3 mg, 0.8 mmol) and ethanol (50 mL), which was degassed with nitrogen and heated at reflux for 6 h. After removal of the solvent, the crude product was purified by column chromatography on silica gel eluted with CH<sub>2</sub>Cl<sub>2</sub>/methanol (20/1) to afford compound (*S*)-**3** as a white solid (190 mg, 56%). <sup>1</sup>H NMR (400 MHz, acetone-*d*<sub>6</sub>) δ 0.92–1.12 (m, 8H), 1.52 (s, 4H), 2.03–2.15 (m, 4H), 2.27 (s, 4H), 4.22 (d, *J* = 14.0 Hz, 4H), 4.38 (d, *J* = 14.6 Hz, 4H), 7.04 (d, *J* = 8.4 Hz, 4H), 7.09–7.15 (m, 4H), 7.16–7.23 (m, 4H), 7.65 (s, 4H), 7.76 (d, *J* = 8.0 Hz, 4H). HR-MS: *m/z* calcd for C<sub>56</sub>H<sub>57</sub>N<sub>4</sub>O<sub>4</sub> [MH]<sup>+</sup>: 849.4374; found: 849.4379.

### Part III. Supplementary Figures.

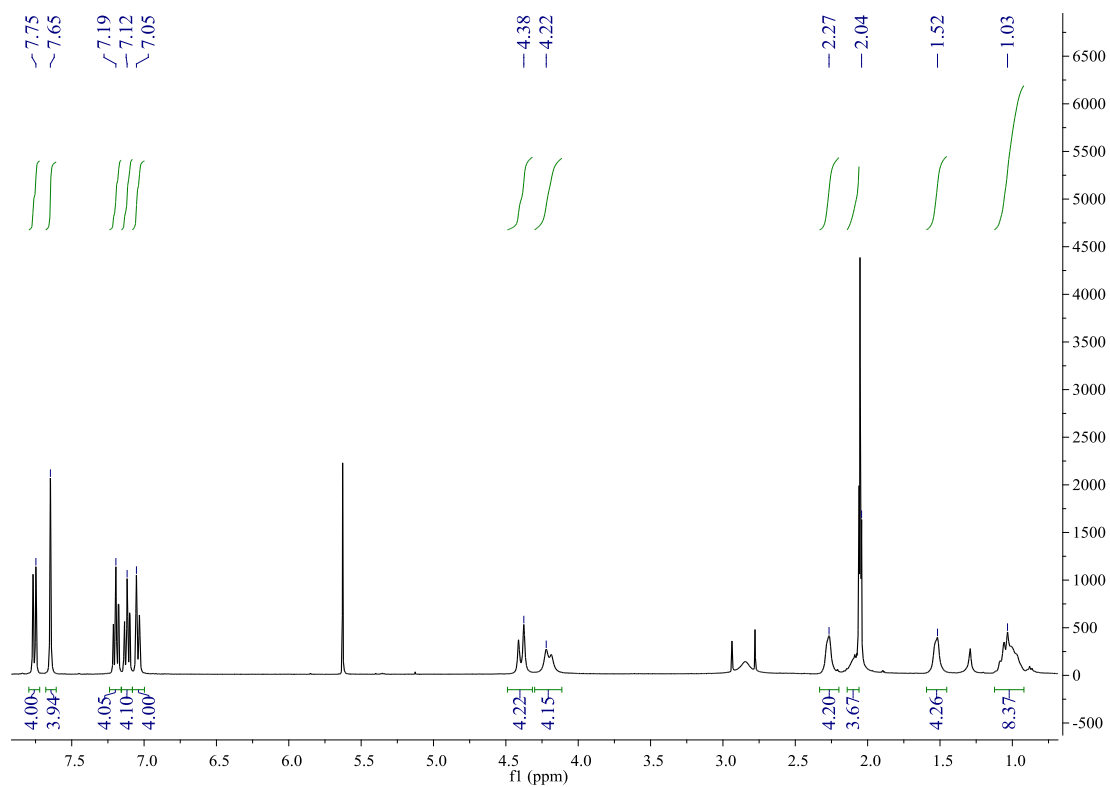

Fig. S1. The <sup>1</sup>H NMR of (S)-3.

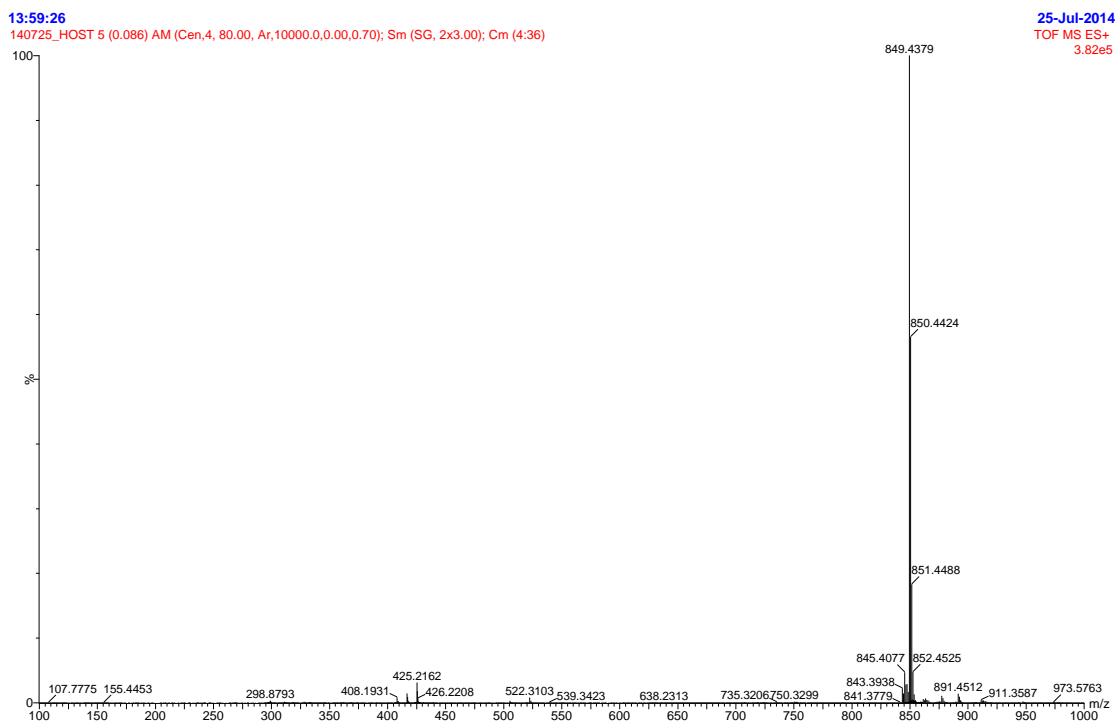

Fig. S2. TOF mass spectra of (S)-3.

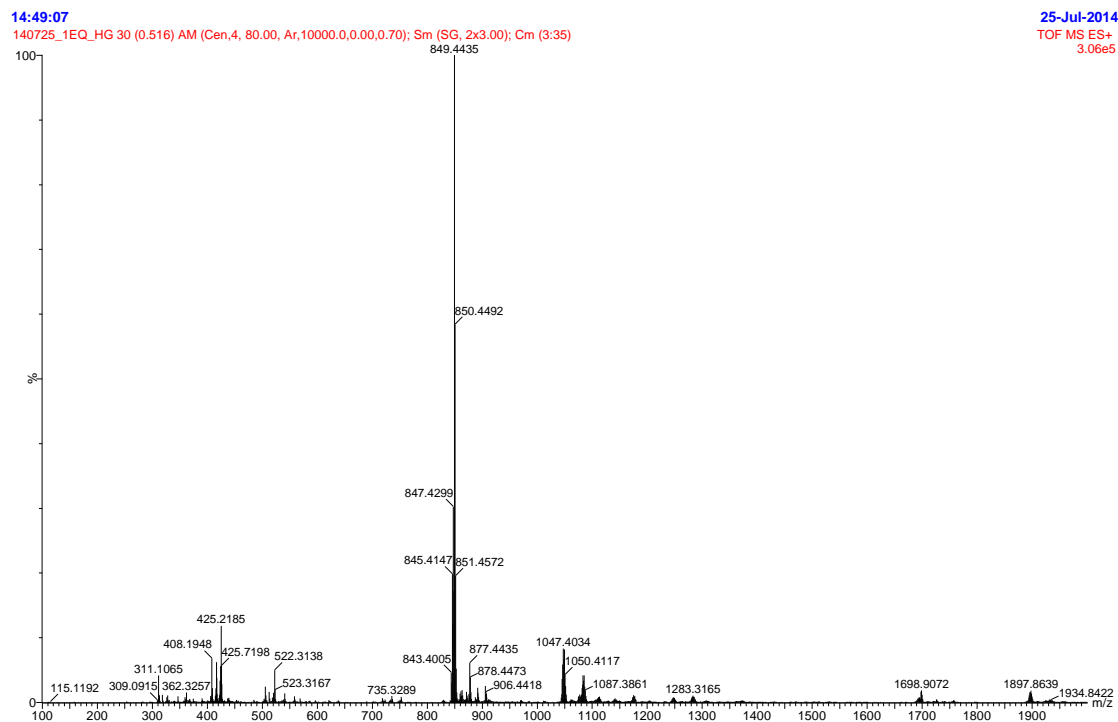

Fig. S3. TOF mass spectra of (*S*)-**3**+ Hg(OAc)<sub>2</sub> (1 equiv.).

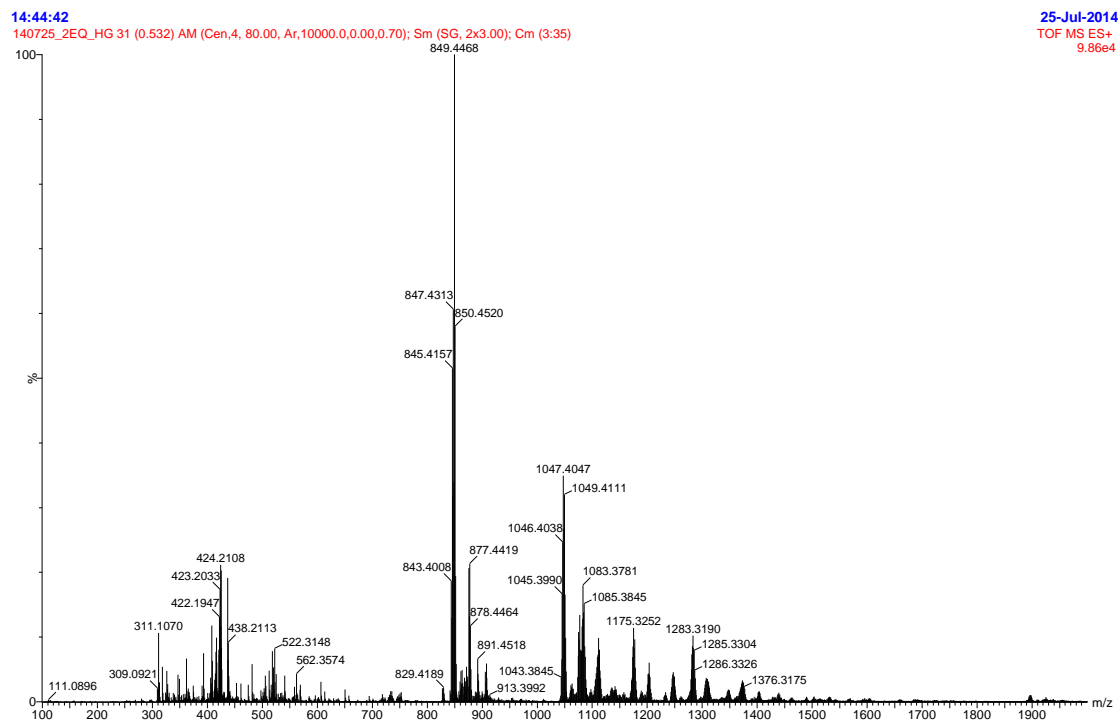

Fig. S4. TOF mass spectra of (*S*)-**3**+ Hg(OAc)<sub>2</sub> (2 equiv.).

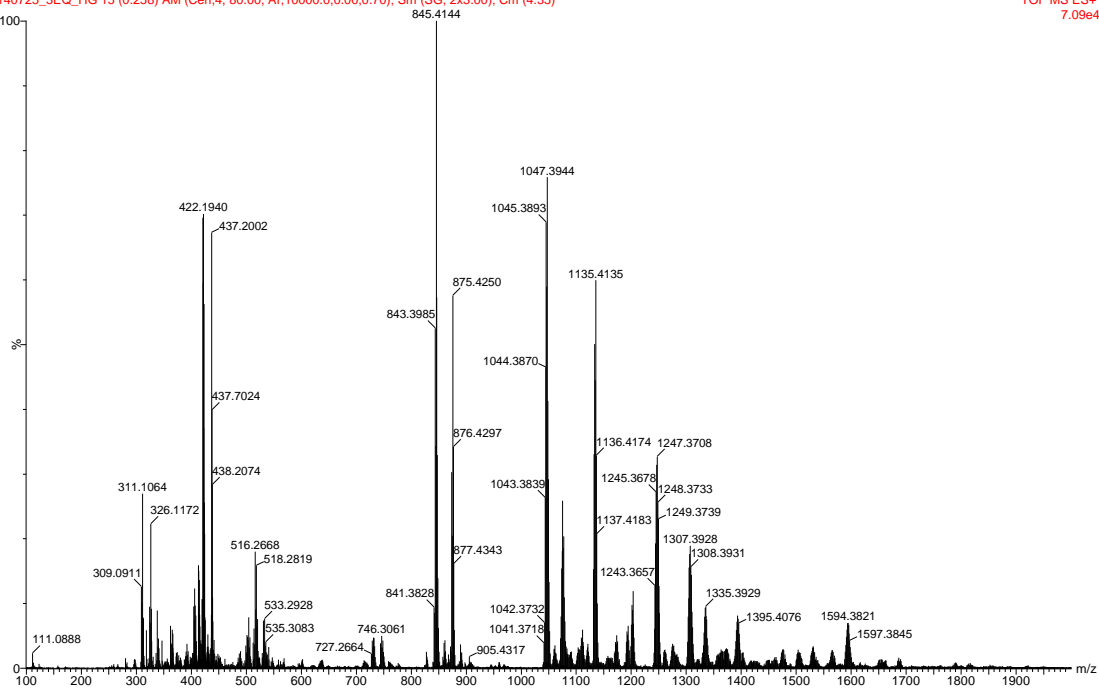

Fig. S5. TOF mass spectra of (*S*)-**3**+ Hg(OAc)<sub>2</sub> (3 equiv.).

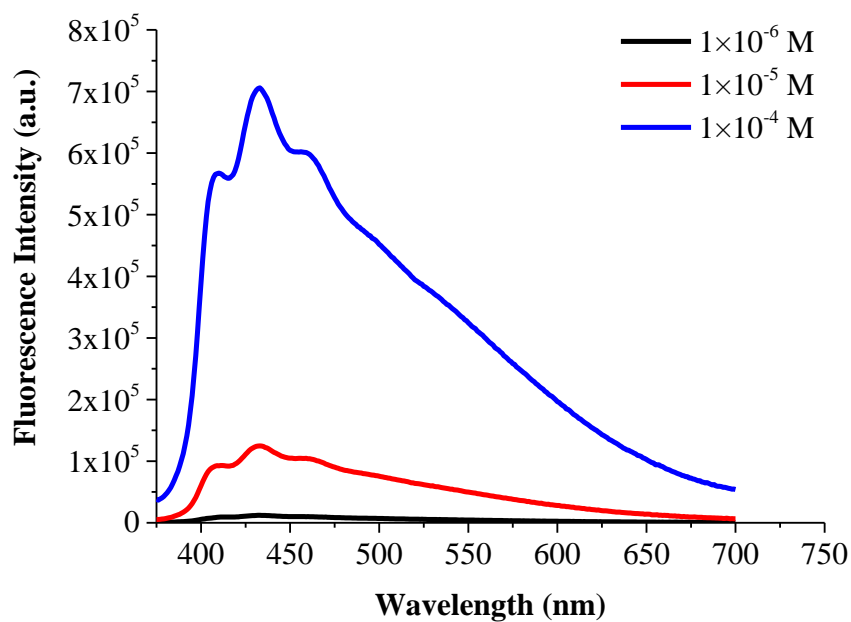

Fig. S6. Steady-state fluorescence emission spectra of (*S*)-**3** with various concentration ( $\lambda_{\text{exc}} = 365 \text{ nm}$ ).

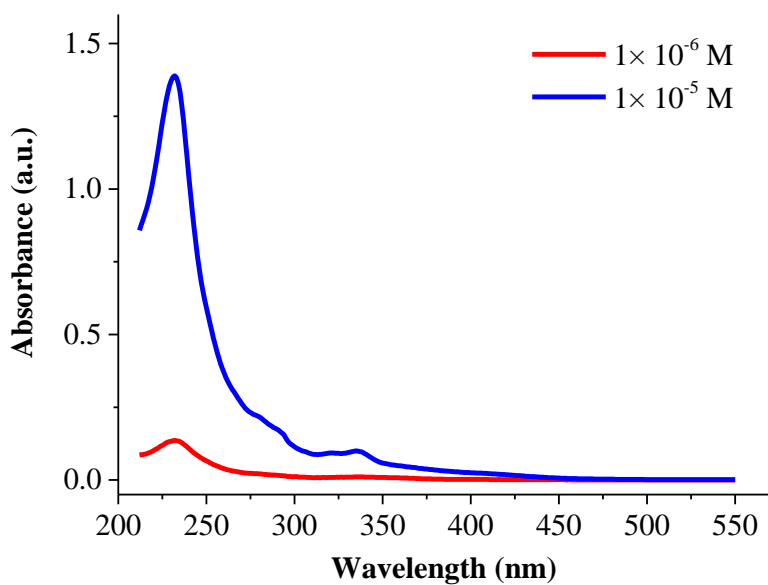

Fig. S7. UV-vis absorption spectra of (*S*)-**3** with various concentration.

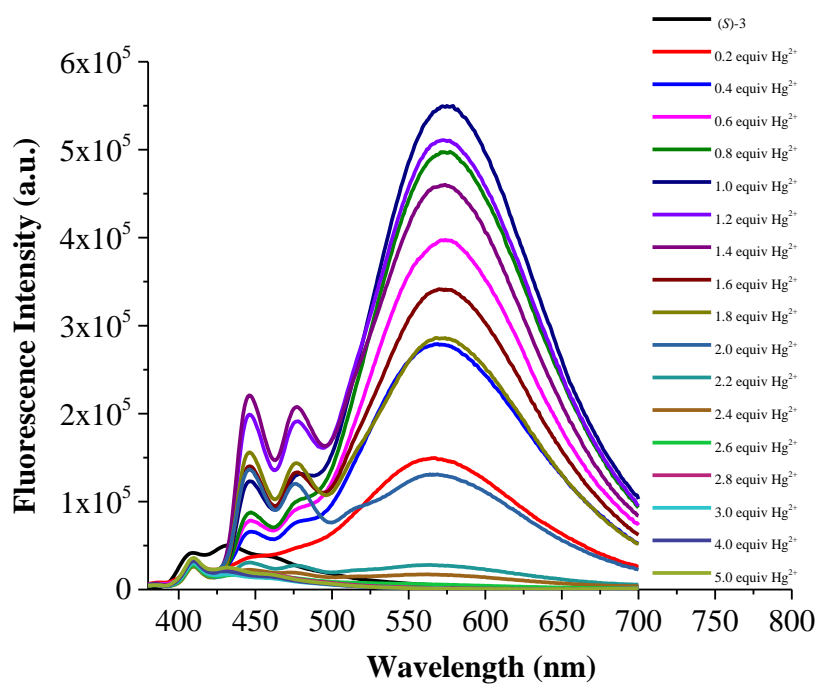

Fig. S8. Steady-state fluorescence emission spectra of the (*S*)-**3** ligand ( $1.0 \times 10^{-5}$  M in methanol) versus the concentration of  $\text{Hg}^{2+}$  ( $\lambda_{\text{exc}} = 365$  nm).

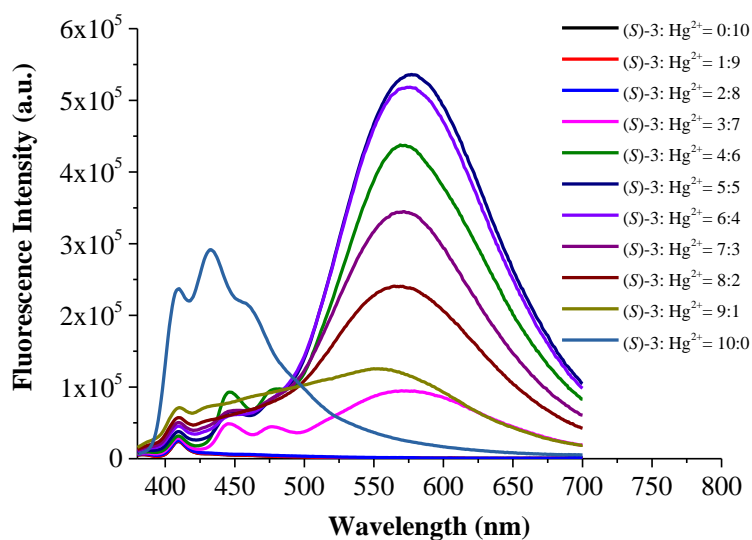

Fig. S9. The steady-state fluorescence emission spectra of the (S)-3 ligand versus Hg<sup>2+</sup> ( $\lambda_{\text{exc}} = 365 \text{ nm}$ ).

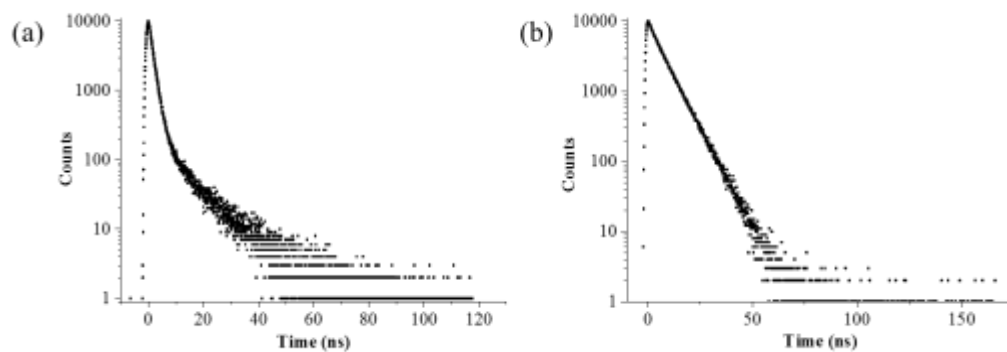

Fig. S10. (a) Fluorescence decay profiles of (S)-3 in methanol; (b) Fluorescence decay profiles of (S)-3 + Hg<sup>2+</sup> (1 equiv.) in methanol.
